# Supplementary material for: Promotion of Physical Activity in Older People Using mHealth and eHealth Technologies: Rapid Review of Reviews
Source: PubMed Central journal article supplement (PMC7803474; doi:10.2196/22201), 2020-12-29
Supplement: jmir_v22i12e22201_app1.pdf [file jmir_v22i12e22201_app1.pdf]

| Database          | Search Terms                                                                                                                                                                                                                                                                                                                                                                                                                                                                                                                                                                                                                                                                                                                                                                                                                                                                                                                                                                                                                          | Output |
|-------------------|---------------------------------------------------------------------------------------------------------------------------------------------------------------------------------------------------------------------------------------------------------------------------------------------------------------------------------------------------------------------------------------------------------------------------------------------------------------------------------------------------------------------------------------------------------------------------------------------------------------------------------------------------------------------------------------------------------------------------------------------------------------------------------------------------------------------------------------------------------------------------------------------------------------------------------------------------------------------------------------------------------------------------------------|--------|
| MEDLINE (Ovid)    | <ol style="list-style-type: none"> <li>1. Older adults.mp.</li> <li>2. Older people.mp.</li> <li>3. elderly.mp.</li> <li>4. mhealth.mp.</li> <li>5. ehealth.mp.</li> <li>6. telehealth.mp.</li> <li>7. Mobile Applications/ or mobile technology.mp.</li> <li>8. technolog*.mp.</li> <li>9. smartphones.mp.</li> <li>10. mobile health.mp.</li> <li>11. physical activity.mp. or Exercise/</li> <li>12. falls.mp. or Accidental Falls/</li> <li>13. falls prevention.mp.</li> <li>14. adherence.mp. or "Treatment Adherence and Compliance"/</li> <li>15. Health* Behavio?r/ or Health Promotion/ or promotion.mp.</li> <li>16. Behavio?r change.mp.</li> <li>17. "Review"/ or "Systematic Review"/</li> <li>18. 1 or 2 or 3</li> <li>19. 4 or 5 or 6 or 7 or 8 or 9 or 10</li> <li>20. 11 or 12 or 13 or 14 or 15 or 16</li> <li>21. 17 and 18 and 19 and 20</li> <li>22. cancer.ti.</li> <li>23. diabet*.ti.</li> <li>24. obesity.ti.</li> <li>25. depress*.ti.</li> <li>26. 22 or 23 or 24 or 25</li> <li>27. 21 not 26</li> </ol> | 158    |
| Scopus (Elsevier) | TITLE-ABS-KEY ( ( "older adults" OR elderly OR "older people" ) AND ( mhealth OR ehealth OR technol* OR telehealth OR "mobile application*" OR smartphone OR "mobile health" ) AND ( "physical                                                                                                                                                                                                                                                                                                                                                                                                                                                                                                                                                                                                                                                                                                                                                                                                                                        | 477    |

|                     |                                                                                                                                                                                                                                                                                                                                                                                                                                                                                     |     |
|---------------------|-------------------------------------------------------------------------------------------------------------------------------------------------------------------------------------------------------------------------------------------------------------------------------------------------------------------------------------------------------------------------------------------------------------------------------------------------------------------------------------|-----|
|                     | activity" OR exercise OR fall* OR "fall* prevention" OR adherence OR "health behav*" OR "health promotion" OR "behav* change" ) AND ( review OR "systematic review" ) AND NOT ( cancer OR obesity OR depress* OR diabet* ) )                                                                                                                                                                                                                                                        |     |
| CINAHL Plus (EBSCO) | AB ( "older adults" or "older people" or elderly ) AND AB ( mhealth or m-health or "mobile health" or "health app" or "health applications" or ehealth or e-health or telehealth or smartphone* or technolog* ) AND AB ( "physical activity" or exercise or fall* or "fall* prevention" or adherence or "health* behavio#r" or "health promotion" or promotion or "behavio#r change" ) AND AB ( review or "systematic review" ) NOT TI ( cancer or diabet* or obesity or depress* ) | 108 |
