# Supplementary material for: Promotion of Physical Activity in Older People Using mHealth and eHealth Technologies: Rapid Review of Reviews
Source: PubMed Central journal article supplement (PMC7803474; doi:10.2196/22201), 2020-12-29
Supplement: jmir_v22i12e22201_app2.pdf [file jmir_v22i12e22201_app2.pdf]

Data extracted from the reviews included: author and year of publication; design; number of included studies and their designs; aim of review; description of included population/s; description of mHealth/eHealth intervention/s; comparators; key outcome/s; effectiveness of interventions; and an overall statement on quality appraisal.
